# Supplementary material
Source: MDPI journal article supplement (https://www.mdpi.com/2076-3417/13/18/10262)
Supplement: s1 [file s1 › applsci-2561205-supplementary.pdf]

# SUPPLEMENTARY INFORMATION

## **Energetic effects in methyl- and methoxy-substituted indanones: a synergistic experimental and computational study**

Ana L.R. Silva\*, Gastón P. Leon, Maria D.M.C. Ribeiro da Silva

Centro de Investigação em Química (CIQUP), Institute of Molecular Sciences (IMS),  
Department of Chemistry and Biochemistry (DQB), Faculty of Sciences of University of  
Porto (FCUP), Rua do Campo Alegre, P-4169-007 Porto, Portugal

\*Corresponding author:

analuisa.rs@fc.up.pt

This supplementary information includes:

- the data of all the combustion calorimetry experiments of indanones (**Tables S1-S4**);
- the corresponding values of standard molar heat capacities in the gaseous phase (**Table S5**);
- the areas and transmission probability factors of the effusion orifices (**Table S6**) and the data of all the effusion experiments for 5-methoxy-1-indanone (**Table S7**);
- the molecular structures of the most stable conformation of 2-methyl-1-indanone, 3-methyl-1-indanone and 4-methoxy-1-indanone in the gaseous phase, optimized by B3LYP/6-31G(d) level of theory (**Fig. S1**);
- the conformational analysis of 5-methoxy-1-indanone (**Table S8**);
- the working reactions for the estimation of the gas-phase enthalpy of formation of indanones (Tables S9-S12) and for 2-methylcyclopentanone (**Table S13**);
- G3(MP2)//B3LYP calculated absolute enthalpies, at  $T = 298.15$  K, and experimental gas-phase values for all the molecules used (**Table S14**).

### Acronyms used throughout this supplementary data:

**2MI** for 2-methyl-1-indanone

**3MI** for 3-methyl-1-indanone

**4MI** for 4-methoxy-1-indanone

**5MI** for 5-methoxy-1-indanone

### SECTION 1 - Combustion Calorimetry

- The calibration of the calorimeters was performed by combustion of benzoic acid (NIST SRM 39j), whose massic energy of combustion, under bomb conditions, is  $-(26434 \pm 3) \text{ J}\cdot\text{g}^{-1}$ ;
  - Calorimetric system I – two values of the energy equivalent of the calorimeter,  $\varepsilon_{\text{cal}} = (15546.7 \pm 1.6) \text{ J}\cdot\text{K}^{-1}$ , and  $\varepsilon_{\text{cal}} = (15553.0 \pm 1.1) \text{ J}\cdot\text{K}^{-1}$ , were obtained (on two separate occasions) and refer to an average mass of 2900.0 g of water added to the calorimeter;
  - Calorimetric system II – the energy equivalent of the calorimeter,  $\varepsilon_{\text{cal}} = (16002.6 \pm 1.7) \text{ J}\cdot\text{K}^{-1}$ , was obtained and corresponds to the average mass of water added to the calorimeter (3119.6 g);  
The uncertainties quoted are the standard deviation of the mean of six calibration experiments.  
Some experiments of **2MI** and **4MI** were performed with the combustion calorimetric system II due to an unexpected problem in one of the valves of the bomb.
- Liquid samples of **2MI** and **3MI** were burnt enclosed into Melinex bags, under oxygen at  $p = 3.04 \text{ MPa}$ , with  $1.00 \text{ cm}^3$  of deionised water added to the bomb;
- Solids samples of **4MI** and **5MI** were ignited in pellet form and under the same condition mentioned above;
- n-Hexadecane (Aldrich, mass fraction  $> 0.999$ ), stored under nitrogen, was added to each pellet of **4MI** to prevent incomplete combustions; the massic energy of combustion of the sample used, was determined in our laboratory as  $\Delta_c u^\circ = -(47136.7 \pm 2.3) \text{ J}\cdot\text{g}^{-1}$ ;
- Melinex bags were made according to the technique described by Skinner et al. [S1]; the massic energy of combustion of dry Melinex and respective expanded uncertainty was  $-(22902 \pm 5) \text{ J}\cdot\text{g}^{-1}$ ;
- The cotton thread fuse (empirical formula:  $\text{CH}_{1.686}\text{O}_{0.843}$ ) had a standard massic energy of combustion [S2],  $\Delta_c u^\circ = -16240 \text{ J}\cdot\text{g}^{-1}$ ;
- The ignition energy was determined from the change in potential difference on discharge of a  $1400 \mu\text{F}$  condenser across a platinum wire;
- Pressure coefficient of specific energy  $(\partial u / \partial p)_T = -0.2 \text{ J}\cdot\text{g}^{-1}\cdot\text{MPa}^{-1}$  (typical value for organic compounds [S3]);
- The energetic correction for the nitric acid formation,  $\Delta U(\text{HNO}_3)$  was based on  $-59.7 \text{ kJ}\cdot\text{mol}^{-1}$  for the molar energy of formation of  $0.1 \text{ mol}\cdot\text{dm}^{-3} \text{ HNO}_3(\text{aq})$  from  $\text{N}_2(\text{g})$ ,  $\text{O}_2(\text{g})$ , and  $\text{H}_2\text{O}(\text{l})$ ;
- Corrections for carbon formation relied on the standard massic energy of combustion of carbon [S4],  $\Delta_c u^\circ = -32.76 \text{ kJ}\cdot\text{g}^{-1}$ ;
- Specific density of the studied compounds and auxiliaries, at  $T = 298.15 \text{ K}$ :  
 $\rho = 1.064 \text{ g}\cdot\text{cm}^{-3}$  for **2MI** [S5],  $\rho = 1.075 \text{ g}\cdot\text{cm}^{-3}$  for **3MI** [S5],  $\rho = 1.0799 \text{ g}\cdot\text{cm}^{-3}$  for **4MI**,  $\rho = 1.292 \text{ g}\cdot\text{cm}^{-3}$  **5MI** [S6],  $\rho = 1.38 \text{ g}\cdot\text{cm}^{-3}$  for Melinex [S1] and  $\rho = 1.50 \text{ g}\cdot\text{cm}^{-3}$  for cotton fuse [S7];
- The values of the massic heat capacities, at  $T = 298.15 \text{ K}$ , were calculated as  $1.634 \text{ J}\cdot\text{K}^{-1}\cdot\text{g}^{-1}$  for **2MI** and **3MI** and  $1.303 \text{ J}\cdot\text{K}^{-1}\cdot\text{g}^{-1}$  for **4MI** and **5MI**, using Kopp's rule [S8].

**Table S1** Standard ( $p^\circ = 0.1$  MPa) mass energy of combustion of liquid 2-methyl-1-indanone (**2MI**), at  $T = 298.15$  K.

|                                                                                           | 1        | 2        | 3        | 4*       | 5*       | 6*       |
|-------------------------------------------------------------------------------------------|----------|----------|----------|----------|----------|----------|
| $m(\text{cpd})/\text{g}$                                                                  | 0.37494  | 0.38190  | 0.43874  | 0.40037  | 0.44589  | 0.42273  |
| $m(\text{fuse})/\text{g}$                                                                 | 0.00286  | 0.00244  | 0.00217  | 0.00252  | 0.00249  | 0.00261  |
| $m(\text{melinex})/\text{g}$                                                              | 0.05215  | 0.05616  | 0.05573  | 0.05467  | 0.05434  | 0.05432  |
| $T_i/\text{K}$                                                                            | 298.1510 | 298.1513 | 298.1515 | 298.1505 | 298.1505 | 298.1515 |
| $T_f/\text{K}$                                                                            | 299.1669 | 299.1886 | 299.3147 | 299.2016 | 299.2995 | 299.2493 |
| $\Delta T_{\text{ad}}/\text{K}$                                                           | 0.93608  | 0.95723  | 1.08524  | 0.96877  | 1.06939  | 1.01773  |
| $\varepsilon_i/\text{J}\cdot\text{K}^{-1}$                                                | 14.10    | 14.10    | 14.12    | 15.87    | 15.88    | 15.87    |
| $\varepsilon_f/\text{J}\cdot\text{K}^{-1}$                                                | 15.11    | 15.14    | 15.31    | 16.95    | 17.09    | 17.02    |
| $(\varepsilon_{\text{cal}})_{\text{corr}}/\text{J}\cdot\text{K}^{-1}$                     | 15541.68 | 15537.91 | 15543.77 | —        | —        | —        |
| $\Delta m(\text{H}_2\text{O})/\text{g}$                                                   | −1.2     | −2.1     | −0.7     | 0.0      | 0.0      | 0.0      |
| $-\Delta U(\text{IBP})/\text{J}$                                                          | 14561.80 | 14887.29 | 16884.84 | 15518.76 | 17130.38 | 16302.77 |
| $\Delta U(\text{HNO}_3)/\text{J}$                                                         | 1.03     | 1.36     | 1.99     | 1.95     | 1.27     | 1.20     |
| $\Delta U(\text{ign})/\text{J}$                                                           | 0.60     | 0.56     | 0.50     | 0.50     | 0.91     | 0.88     |
| $\Delta U_{\Sigma}/\text{J}$                                                              | 8.12     | 8.35     | 9.54     | 8.64     | 9.58     | 9.09     |
| $-\Delta U(\text{melinex})/\text{J}$                                                      | 1194.32  | 1286.16  | 1276.34  | 1252.12  | 1244.58  | 1244.12  |
| $-\Delta U(\text{fuse})/\text{J}$                                                         | 46.45    | 39.63    | 35.24    | 40.92    | 40.44    | 42.39    |
| $-\Delta_c u^\circ/(\text{J}\cdot\text{g}^{-1})$                                          | 35504.03 | 35485.18 | 35469.14 | 35504.96 | 35512.14 | 35499.74 |
| % $\text{CO}_2 = (99.93 \pm 0.07)^a$                                                      |          |          |          |          |          |          |
| $\langle \Delta_c u^\circ \rangle = -(35495.53 \pm 6.44) \text{ J}\cdot\text{g}^{-1}{}^a$ |          |          |          |          |          |          |

$m(\text{cpd})$  is the mass of compound burnt in each experiment;  $m(\text{fuse})$  is the mass of fuse (cotton) used in each experiment;  $m(\text{melinex})$  is the mass of melinex used in each experiment;  $T_i$  is the initial temperature rise;  $T_f$  is the final temperature rise;  $\Delta T_{\text{ad}}$  is the corrected temperature rise;  $\varepsilon_i$  and  $\varepsilon_f$  are the energy equivalents of contents in the initial and final state;  $(\varepsilon_{\text{cal}})_{\text{corr}}$  is the corrected energy equivalent of the calorimeter I for the amount of water used in the calorimeter (exp. 1 to 3), for this calculation  $\varepsilon_{\text{cal}} = (15546.7 \pm 1.6) \text{ J}\cdot\text{K}^{-1}$  was used;  $\Delta m(\text{H}_2\text{O})$  is the deviation of the mass of water added to the calorimeter from 2900.0 g (exp. 1 to 3; calorimetric system I) and 3119.6 g (exp. 4 to 6; calorimetric system II);  $\Delta U(\text{IBP})$  is the energy change for the isothermal combustion reaction and includes  $\Delta U(\text{ign})$ ;  $\Delta U(\text{HNO}_3)$  is the energy correction for the nitric acid formation;  $\Delta U(\text{ign})$  is the electrical energy for ignition;  $\Delta U_{\Sigma}$  is the standard state correction;  $\Delta U(\text{melinex})$  is the energy of combustion of the melinex;  $\Delta U(\text{fuse})$  is the energy of combustion of the fuse (cotton);  $\Delta_c u^\circ$  is the standard massic energy of combustion.

\*Energy equivalent of the calorimeter II,  $\varepsilon_{\text{cal}} = (16002.6 \pm 1.7) \text{ J}\cdot\text{K}^{-1}$ , was used. <sup>a</sup> Mean value and standard deviation of the mean.

**Table S2** Standard ( $p^\circ = 0.1$  MPa) mass energy of combustion of liquid 3-methyl-1-indanone (**3MI**), at  $T = 298.15$  K.

|                                                                                           | 1        | 2        | 3        | 4        | 5        | 6        |
|-------------------------------------------------------------------------------------------|----------|----------|----------|----------|----------|----------|
| $m(\text{cpd})/\text{g}$                                                                  | 0.38534  | 0.49432  | 0.46788  | 0.39851  | 0.37742  | 0.35060  |
| $m(\text{fuse})/\text{g}$                                                                 | 0.00329  | 0.00277  | 0.00279  | 0.00250  | 0.00224  | 0.00281  |
| $m(\text{melinex})/\text{g}$                                                              | 0.04789  | 0.05589  | 0.05532  | 0.04241  | 0.05394  | 0.05647  |
| $T_i/\text{K}$                                                                            | 298.1504 | 298.1511 | 298.1506 | 298.1508 | 298.1509 | 298.1504 |
| $T_f/\text{K}$                                                                            | 299.1866 | 299.4402 | 299.3816 | 299.2088 | 299.1756 | 299.1189 |
| $\Delta T_{\text{ad}}/\text{K}$                                                           | 0.95602  | 1.21731  | 1.15597  | 0.97730  | 0.94498  | 0.88771  |
| $\varepsilon_i/\text{J}\cdot\text{K}^{-1}$                                                | 13.20    | 13.20    | 13.19    | 13.15    | 13.16    | 13.16    |
| $\varepsilon_f/\text{J}\cdot\text{K}^{-1}$                                                | 14.20    | 14.50    | 14.42    | 14.19    | 14.15    | 14.07    |
| $(\varepsilon_{\text{cal}})_{\text{corr}}/\text{J}\cdot\text{K}^{-1}$                     | 15543.35 | 15540.42 | 15538.33 | 15550.05 | 15553.00 | 15551.33 |
| $\Delta m(\text{H}_2\text{O})/\text{g}$                                                   | -0.8     | -1.5     | -2.0     | 0.8      | 0.0      | -0.4     |
| $-\Delta U(\text{IBP})/\text{J}$                                                          | 14872.72 | 18934.39 | 17977.75 | 15210.21 | 14710.03 | 13816.98 |
| $\Delta U(\text{HNO}_3)/\text{J}$                                                         | 2.44     | 1.34     | 0.97     | 0.79     | 1.33     | 2.67     |
| $\Delta U(\text{ign})/\text{J}$                                                           | 0.61     | 0.77     | 0.76     | 0.72     | 0.61     | 0.58     |
| $\Delta U_{\Sigma}/\text{J}$                                                              | 8.34     | 10.86    | 10.27    | 8.48     | 8.25     | 7.79     |
| $-\Delta U(\text{melinex})/\text{J}$                                                      | 1096.78  | 1279.99  | 1266.97  | 971.36   | 1235.44  | 1293.24  |
| $-\Delta U(\text{fuse})/\text{J}$                                                         | 53.43    | 44.98    | 45.31    | 40.60    | 36.38    | 45.63    |
| $-\Delta_c u^\circ/(\text{J}\cdot\text{g}^{-1})$                                          | 35583.46 | 35598.84 | 35595.09 | 35605.08 | 35580.10 | 35560.90 |
| % $\text{CO}_2 = (99.28 \pm 0.07)^a$                                                      |          |          |          |          |          |          |
| $\langle \Delta_c u^\circ \rangle = -(35587.25 \pm 6.52) \text{ J}\cdot\text{g}^{-1}{}^a$ |          |          |          |          |          |          |

$m(\text{cpd})$  is the mass of compound burnt in each experiment;  $m(\text{fuse})$  is the mass of fuse (cotton) used in each experiment;  $m(\text{melinex})$  is the mass of melinex used in each experiment;  $T_i$  is the initial temperature rise;  $T_f$  is the final temperature rise;  $\Delta T_{\text{ad}}$  is the corrected temperature rise;  $\varepsilon_i$  and  $\varepsilon_f$  are the energy equivalents of contents in the initial and final state;  $(\varepsilon_{\text{cal}})_{\text{corr}}$  is the corrected energy equivalent of the calorimeter for the amount of water used in the calorimeter, for this calculation,  $\varepsilon_{\text{cal}} = (15546.7 \pm 1.6) \text{ J}\cdot\text{K}^{-1}$  was used, except in expts. 5 and 6, in which  $\varepsilon_{\text{cal}} = (15553.0 \pm 1.1) \text{ J}\cdot\text{K}^{-1}$ ;  $\Delta m(\text{H}_2\text{O})$  is the deviation of the mass of water added to the calorimeter from 2900.0 g;  $\Delta U(\text{IBP})$  is the energy change for the isothermal combustion reaction and includes  $\Delta U(\text{ign})$ ;  $\Delta U(\text{HNO}_3)$  is the energy correction for the nitric acid formation;  $\Delta U(\text{ign})$  is the electrical energy for ignition;  $\Delta U_{\Sigma}$  is the standard state correction;  $\Delta U(\text{melinex})$  is the energy of combustion of the melinex;  $\Delta U(\text{fuse})$  is the energy of combustion of the fuse (cotton);  $\Delta_c u^\circ$  is the standard massic energy of combustion.

<sup>a</sup> Mean value and standard deviation of the mean.

**Table S3** Standard ( $p^\circ = 0.1$  MPa) mass energy of combustion of solid 4-methoxy-1-indanone (**4MI**), at  $T = 298.15$  K.

|                                                                       | 1        | 2        | 3        | 4        | 5*       | 6*       |
|-----------------------------------------------------------------------|----------|----------|----------|----------|----------|----------|
| $m(\text{cpd})/\text{g}$                                              | 0.49212  | 0.47396  | 0.35075  | 0.41472  | 0.42282  | 0.42886  |
| $m(\text{fuse})/\text{g}$                                             | 0.00229  | 0.00236  | 0.00272  | 0.00205  | 0.00252  | 0.00240  |
| $m(\text{n-hexadec.})/\text{g}$                                       | 0.10431  | 0.06766  | 0.10944  | 0.09710  | 0.10640  | 0.10468  |
| $T_i/\text{K}$                                                        | 298.1504 | 298.1514 | 298.1548 | 298.1504 | 298.1508 | 298.1511 |
| $T_f/\text{K}$                                                        | 299.5198 | 299.3785 | 299.2680 | 299.3503 | 299.3637 | 299.3734 |
| $\Delta T_{\text{ad}}/\text{K}$                                       | 1.30199  | 1.15408  | 1.03565  | 1.12577  | 1.13700  | 1.14400  |
| $\varepsilon_i/\text{J}\cdot\text{K}^{-1}$                            | 13.80    | 13.70    | 13.64    | 13.69    | 15.03    | 15.03    |
| $\varepsilon_f/\text{J}\cdot\text{K}^{-1}$                            | 14.83    | 14.57    | 14.48    | 14.59    | 15.96    | 15.97    |
| $(\varepsilon_{\text{cal}})_{\text{corr}}/\text{J}\cdot\text{K}^{-1}$ | 15559.28 | 15558.02 | 15549.65 | 15553.00 | —        | —        |
| $\Delta m(\text{H}_2\text{O})/\text{g}$                               | 1.5      | 1.2      | −0.8     | 0.0      | 0.0      | 0.0      |
| $-\Delta U(\text{IBP})/\text{J}$                                      | 20276.64 | 17971.46 | 16118.42 | 17524.96 | 18212.62 | 18324.77 |
| $\Delta U(\text{HNO}_3)/\text{J}$                                     | 0.60     | 1.40     | 0.64     | 0.63     | 0.69     | 0.65     |
| $\Delta U(\text{ign})/\text{J}$                                       | 0.70     | 0.56     | 0.58     | 0.57     | 0.72     | 0.72     |
| $\Delta U_{\Sigma}/\text{J}$                                          | 10.56    | 9.65     | 7.70     | 8.84     | 9.03     | 9.13     |
| $\Delta U(\text{carb})/\text{J}$                                      | —        | 5.94     | —        | —        | —        | —        |
| $-\Delta U(\text{n-hexadec.})/\text{J}$                               | 4916.79  | 3189.45  | 5158.43  | 4576.99  | 5015.43  | 4934.25  |
| $-\Delta U(\text{fuse})/\text{J}$                                     | 37.19    | 38.33    | 44.17    | 33.29    | 40.92    | 38.98    |
| $-\Delta_c u^\circ/(\text{J}\cdot\text{g}^{-1})$                      | 31113.35 | 31096.65 | 31097.59 | 31117.89 | 31091.95 | 31109.22 |

$$\% \text{ CO}_2 = (100.04 \pm 0.02)^a$$

$$\langle \Delta_c u^\circ \rangle = -(31104.44 \pm 4.27) \text{ J}\cdot\text{g}^{-1}{}^a$$

$m(\text{cpd})$  is the mass of compound burnt in each experiment;  $m(\text{fuse})$  is the mass of fuse (cotton) used in each experiment;  $m(\text{n-hexadec.})$  is the mass of n-hexadecane used in each experiment;  $T_i$  is the initial temperature rise;  $T_f$  is the final temperature rise;  $\Delta T_{\text{ad}}$  is the corrected temperature rise;  $\varepsilon_i$  and  $\varepsilon_f$  are the energy equivalents of contents in the initial and final state;  $(\varepsilon_{\text{cal}})_{\text{corr}}$  is the corrected energy equivalent of the calorimeter I for the amount of water used in the calorimeter (exp. 1 to 4), for this calculation  $\varepsilon_{\text{cal}} = (15553.0 \pm 1.1) \text{ J}\cdot\text{K}^{-1}$  was used;  $\Delta m(\text{H}_2\text{O})$  is the deviation of the mass of water added to the calorimeter from 2900.0 g (exp. 1 to 4; calorimetric system I) and 3119.6 g (exp. 5 and 6; calorimetric system II);  $\Delta U(\text{IBP})$  is the energy change for the isothermal combustion reaction and includes  $\Delta U(\text{ign})$ ;  $\Delta U(\text{HNO}_3)$  is the energy correction for the nitric acid formation;  $\Delta U(\text{ign})$  is the electrical energy for ignition;  $\Delta U_{\Sigma}$  is the standard state correction;  $\Delta U(\text{carb.})$  is the correction energy for carbon soot formation;  $\Delta U(\text{n-hexadec.})$  is the energy of combustion of the n-hexadecane;  $\Delta U(\text{fuse})$  is the energy of combustion of the fuse (cotton);  $\Delta_c u^\circ$  is the standard massic energy of combustion. \*Energy equivalent of the calorimeter,  $\varepsilon_{\text{cal}} = (16002.6 \pm 1.7) \text{ J}\cdot\text{K}^{-1}$ , was used. <sup>a</sup> Mean value and standard deviation of the mean.

**Table S4** Standard ( $p^\circ = 0.1$  MPa) mass energy of combustion of solid 5-methoxy-1-indanone (**5MI**), at  $T = 298.15$  K.

|                                                  | 1        | 2        | 3        | 4        | 5        | 6        |
|--------------------------------------------------|----------|----------|----------|----------|----------|----------|
| $m(\text{cpd})/\text{g}$                         | 0.59158  | 0.61595  | 0.61366  | 0.60916  | 0.61473  | 0.61148  |
| $m(\text{fuse})/\text{g}$                        | 0.00299  | 0.00289  | 0.00285  | 0.00294  | 0.00282  | 0.00290  |
| $T_i/\text{K}$                                   | 298.1512 | 298.1506 | 298.1504 | 298.1508 | 298.1509 | 298.1511 |
| $T_f/\text{K}$                                   | 299.3831 | 299.4235 | 299.4187 | 299.4124 | 299.4208 | 299.4154 |
| $\Delta T_{\text{ad}}/\text{K}$                  | 1.15181  | 1.19865  | 1.19449  | 1.18615  | 1.19537  | 1.19056  |
| $\varepsilon_i/\text{J}\cdot\text{K}^{-1}$       | 16.14    | 16.17    | 16.17    | 16.16    | 16.17    | 16.16    |
| $\varepsilon_f/\text{J}\cdot\text{K}^{-1}$       | 16.99    | 17.06    | 17.05    | 17.04    | 17.05    | 17.05    |
| $-\Delta U(\text{IBP})/\text{J}$                 | 18450.89 | 19201.31 | 19134.71 | 19000.88 | 19148.57 | 19071.34 |
| $\Delta U(\text{HNO}_3)/\text{J}$                | 0.52     | 0.48     | 0.65     | 0.62     | 0.48     | 0.41     |
| $\Delta U(\text{ign})/\text{J}$                  | 0.62     | 0.64     | 0.59     | 0.80     | 0.83     | 0.91     |
| $\Delta U_\Sigma/\text{J}$                       | 11.01    | 11.52    | 11.47    | 11.38    | 11.48    | 11.43    |
| $\Delta U(\text{carb})/\text{J}$                 | 2.64     | 5.94     | 11.55    | 3.96     | 26.40    | 6.60     |
| $-\Delta U(\text{fuse})/\text{J}$                | 48.56    | 46.93    | 46.28    | 47.75    | 45.80    | 47.10    |
| $-\Delta_c u^\circ/(\text{J}\cdot\text{g}^{-1})$ | 31092.06 | 31087.46 | 31104.94 | 31100.35 | 31098.55 | 31103.37 |

$$\% \text{ CO}_2 = (99.99 \pm 0.04)^a$$

$$\langle \Delta_c u^\circ \rangle = -(31097.79 \pm 2.76) \text{ J}\cdot\text{g}^{-1}{}^a$$

$m(\text{cpd})$  is the mass of compound burnt in each experiment;  $m(\text{fuse})$  is the mass of fuse (cotton) used in each experiment;  $m(\text{carb})$  is the mass of carbon;  $T_i$  is the initial temperature rise;  $T_f$  is the final temperature rise;  $\Delta T_{\text{ad}}$  is the corrected temperature rise;  $\varepsilon_i$  and  $\varepsilon_f$  are the energy equivalents of contents in the initial and final state;  $\Delta U(\text{IBP})$  is the energy change for the isothermal combustion reaction and includes  $\Delta U(\text{ign})$ , for this calculation,  $\varepsilon_{\text{cal}} = (16002.6 \pm 1.7) \text{ J}\cdot\text{K}^{-1}$  was used;  $\Delta U(\text{HNO}_3)$  is the energy correction for the nitric acid formation;  $\Delta U(\text{ign})$  is the electrical energy for ignition;  $\Delta U_\Sigma$  is the standard state correction;  $\Delta U(\text{carb})$  is the correction energy for carbon soot formation;  $\Delta U(\text{fuse})$  is the energy of combustion of the fuse (cotton);  $\Delta_c u^\circ$  is the standard massic energy of combustion. <sup>a</sup> Mean value and standard deviation of the mean.

## SECTION 2 – Calvet microcalorimetry

Samples of ~5 mg were dropped, simultaneously with the corresponding blank tube, at room temperature ( $T \sim 298$  K), into the reaction vessel of the microcalorimeter (at a pre-defined temperature). After the tubes reached thermal equilibrium, the sample was removed from the hot-zone by sublimation or vaporization under reduced pressure. A correction,  $k$ , to the internal calibration constant of the calorimeter was obtained as the average of six independent experiments with naphthalene (Sigma-Aldrich 99.9%),  $k = (1.038 \pm 0.003)$  at  $T = 366$  K for 4MI and 5MI. Undecane (Sigma-Aldrich 99.9%) was used in the calibration study for liquids:  $k = (1.039 \pm 0.008)$  at  $T = 345$  K for 2MI and  $k = (1.027 \pm 0.008)$  at  $T = 355$  K for 3MI.

**TABLE S5**

Standard ( $p^\circ = 0.1$  MPa) molar heat capacities in the gaseous phase for the studied compounds.

| $T / \text{K}$ | $\frac{C_{p,m}^\circ(\text{g})}{\text{J} \cdot \text{K}^{-1} \cdot \text{mol}^{-1}}$ | $T / \text{K}$ | $\frac{C_{p,m}^\circ(\text{g})}{\text{J} \cdot \text{K}^{-1} \cdot \text{mol}^{-1}}$ |
|----------------|--------------------------------------------------------------------------------------|----------------|--------------------------------------------------------------------------------------|
| <b>2MI</b>     |                                                                                      | <b>3MI</b>     |                                                                                      |
| 150            | 87.83                                                                                | 150            | 87.22                                                                                |
| 200            | 111.41                                                                               | 200            | 111.08                                                                               |
| 250            | 137.08                                                                               | 250            | 137.01                                                                               |
| 298.15         | 162.80                                                                               | 298.15         | 162.88                                                                               |
| 300            | 163.79                                                                               | 300            | 163.88                                                                               |
| 350            | 190.17                                                                               | 350            | 190.33                                                                               |
| 400            | 215.17                                                                               | 400            | 215.35                                                                               |
| 450            | 238.22                                                                               | 450            | 238.40                                                                               |
| 500            | 259.15                                                                               | 500            | 259.30                                                                               |
| 550            | 278.02                                                                               | 550            | 278.15                                                                               |
| <b>4MI</b>     |                                                                                      | <b>5MI</b>     |                                                                                      |
| 150            | 100.18                                                                               | 150            | 99.79                                                                                |
| 200            | 125.17                                                                               | 200            | 124.97                                                                               |
| 250            | 151.78                                                                               | 250            | 151.74                                                                               |
| 298.15         | 178.17                                                                               | 298.15         | 178.22                                                                               |
| 300            | 179.18                                                                               | 300            | 179.24                                                                               |
| 350            | 206.18                                                                               | 350            | 206.28                                                                               |
| 400            | 231.79                                                                               | 400            | 231.92                                                                               |
| 450            | 255.46                                                                               | 450            | 255.61                                                                               |
| 500            | 277.01                                                                               | 500            | 277.15                                                                               |
| 550            | 296.47                                                                               | 550            | 296.61                                                                               |

$$C_{p,m}^\circ(2\text{MI}, \text{g}) / (\text{J} \cdot \text{K}^{-1} \cdot \text{mol}^{-1}) = -9.950 \times 10^{-7} T^3 + 8.663 \times 10^{-4} T^2 + 2.744 \times 10^{-1} T + 30.23$$

$$C_{p,m}^\circ(3\text{MI}, \text{g}) / (\text{J} \cdot \text{K}^{-1} \cdot \text{mol}^{-1}) = -9.747 \times 10^{-7} T^3 + 8.348 \times 10^{-4} T^2 + 2.901 \times 10^{-1} T + 27.90$$

$$C_{p,m}^\circ(4\text{MI}, \text{g}) / (\text{J} \cdot \text{K}^{-1} \cdot \text{mol}^{-1}) = -9.122 \times 10^{-7} T^3 + 7.639 \times 10^{-4} T^2 + 3.276 \times 10^{-1} T + 36.70$$

$$C_{p,m}^\circ(5\text{MI}, \text{g}) / (\text{J} \cdot \text{K}^{-1} \cdot \text{mol}^{-1}) = -8.990 \times 10^{-7} T^3 + 7.442 \times 10^{-4} T^2 + 3.373 \times 10^{-1} T + 35.24$$

### **SECTION 3 – Knudsen effusion method**

- The apparatus is prepared for the simultaneous use of nine effusion cells grouped in three series (“Small” – series A; “Medium” – series B; “Large” – series C);
- The areas and transmission probability factors of the effusion orifices are presented in Table S6;
- The temperature of each block is measured by a platinum resistance thermometer Pt-100 class 1/10;
- For the temperature  $T$ , the vapour pressure  $p$  of the crystalline compound is related to the mass  $m$  of the sample sublimed from each effusion cell, during the time period  $t$  by equation (S1), where  $M$  is the molar mass of the effusing vapour,  $R$  is the gas constant,  $A_0$  is the area of the effusion orifice and  $w_0$  is the respective transmission probability factor (calculated using the equation presented in Table S6).

$$p = (m/A_0 w_0 t) \cdot (2\pi RT/M)^{1/2} \quad (\text{S1})$$

**Table S6.** Area and transmission probability factors of the effusion orifices

|          | Orifice        | $A_0/\text{mm}^2$ | $w_0$ |
|----------|----------------|-------------------|-------|
| Series A | A <sub>1</sub> | 0.502             | 0.988 |
|          | A <sub>2</sub> | 0.509             | 0.988 |
|          | A <sub>3</sub> | 0.503             | 0.988 |
| Series B | B <sub>4</sub> | 0.774             | 0.991 |
|          | B <sub>5</sub> | 0.783             | 0.991 |
|          | B <sub>6</sub> | 0.792             | 0.991 |
| Series C | C <sub>7</sub> | 1.099             | 0.992 |
|          | C <sub>8</sub> | 1.125             | 0.992 |
|          | C <sub>9</sub> | 1.131             | 0.992 |

$w_0 = \{1 + (3l/8r)\}^{-1}$ , where  $l$  is the length of the effusion orifice ( $l = 0.0125$  mm) and  $r$  is its radius.

**Table S7.** Effusion results for 5MI in solid phase

| $T^a$ / K | $t$ / s | Orifices                                       | $m$ / mg |       |       | $p^b$ / Pa |       |       |
|-----------|---------|------------------------------------------------|----------|-------|-------|------------|-------|-------|
|           |         |                                                | $m_A$    | $m_B$ | $m_C$ | $p_A$      | $p_B$ | $p_C$ |
| 315.397   | 23448   | A <sub>3</sub> -B <sub>6</sub> -C <sub>9</sub> | 4.53     | 5.53  | 6.99  | 0.098      | 0.097 | 0.098 |
| 317.307   | 23448   | A <sub>2</sub> -B <sub>5</sub> -C <sub>8</sub> | 5.68     | 7.00  | 8.75  | 0.123      | 0.123 | 0.122 |
| 319.091   | 23448   | A <sub>1</sub> -B <sub>4</sub> -C <sub>7</sub> | 7.06     | 8.94  | 10.88 | 0.154      | 0.158 | 0.153 |
| 321.279   | 27214   | A <sub>2</sub> -B <sub>5</sub> -C <sub>8</sub> | 10.52    | 12.93 | 16.26 | 0.198      | 0.197 | 0.197 |
| 323.096   | 27214   | A <sub>1</sub> -B <sub>4</sub> -C <sub>7</sub> | 13.08    | 16.54 | 20.02 | 0.247      | 0.253 | 0.244 |
| 325.524   | 16320   | A <sub>3</sub> -B <sub>6</sub> -C <sub>9</sub> | 9.80     | 12.00 | 15.25 | 0.310      | 0.307 | 0.311 |
| 327.280   | 16320   | A <sub>2</sub> -B <sub>5</sub> -C <sub>8</sub> | 12.18    | 15.04 | 18.83 | 0.386      | 0.386 | 0.384 |
| 329.088   | 16320   | A <sub>1</sub> -B <sub>4</sub> -C <sub>7</sub> | 15.08    | 19.15 | 22.98 | 0.480      | 0.492 | 0.470 |
| 331.390   | 11514   | A <sub>3</sub> -B <sub>6</sub> -C <sub>9</sub> | 13.70    | 16.63 | 21.10 | 0.620      | 0.608 | 0.614 |
| 333.305   | 11514   | A <sub>2</sub> -B <sub>5</sub> -C <sub>8</sub> | 16.81    | 20.76 | 25.79 | 0.762      | 0.762 | 0.753 |
| 335.093   | 11514   | A <sub>1</sub> -B <sub>4</sub> -C <sub>7</sub> | 20.71    | 26.20 | 31.62 | 0.942      | 0.964 | 0.926 |
| 337.323   | 10969   | A <sub>3</sub> -B <sub>6</sub> -C <sub>9</sub> | 25.14    | 30.36 | 38.83 | 1.204      | 1.176 | 1.198 |

<sup>a</sup> The standard uncertainty of the temperature is  $u(T) = \pm 0.01$  K.

<sup>b</sup> The standard uncertainty of the pressure is  $u(p) = \pm 0.05$  Pa.

## SECTION 4 – Computational study

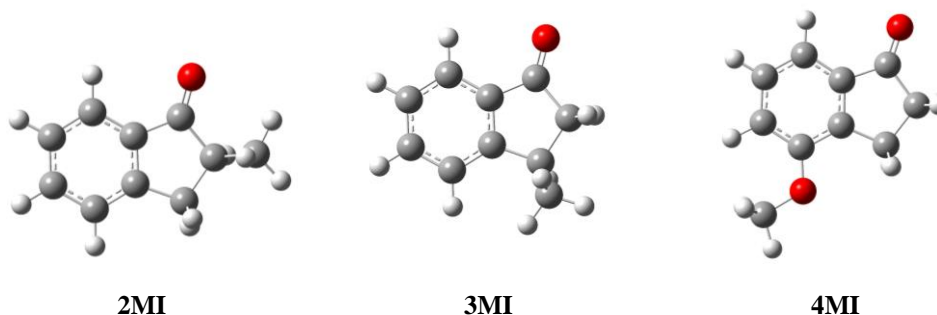

**Fig. S1.** Molecular structures of the most stable conformation of 2MI, 3MI and 4MI in the gaseous phase, optimized by B3LYP/6-31G(d) level of theory.

**Table S8.** Conformational analysis of 5MI, corresponding total electronic energy plus the internal thermal energy,  $E_{298.15\text{ K}}^\circ$ , and G3(MP2)//B3LYP results for both conformers

| Conformer                                                                                        | $E_{298.15\text{ K}}^\circ$ <sup>a</sup> | $H_m^\circ$ <sup>a</sup> | $G_m^\circ$ <sup>a</sup> | $\Delta G_{\text{rel}}(i)$ <sup>b</sup> | $\chi_i$ <sup>c</sup> |
|--------------------------------------------------------------------------------------------------|------------------------------------------|--------------------------|--------------------------|-----------------------------------------|-----------------------|
| 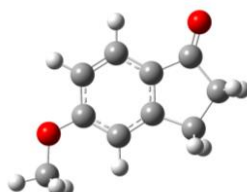<br><b>I</b>  | -536.698137                              | -536.697193              | -536.744919              | 0.00                                    | 59.55                 |
| 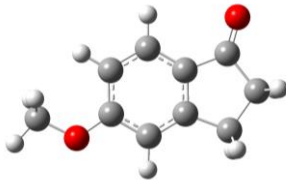<br><b>II</b> | -536.697679                              | -536.696735              | -536.744554              | 0.96                                    | 40.45                 |
| Weighted value of $H_m^\circ = -536.697008$ hartrees used in the calculations                    |                                          |                          |                          |                                         |                       |

<sup>a</sup> In Hartrees: 1 Hartree = 2625.5 kJ·mol<sup>-1</sup>;

<sup>b</sup> Value calculated according to this formula:  $\Delta G_{\text{rel}}(i) = G_m^\circ(i) - G_m^\circ(\text{conformer I})$ ; in kJ·mol<sup>-1</sup>;

<sup>c</sup> Value calculated using the formula:  $\chi_i = \frac{e^{-\frac{\Delta G_{\text{rel}}(i)}{RT}}}{\sum_{i=1}^n e^{-\frac{\Delta G_{\text{rel}}(i)}{RT}}}$ .

**Table S9.** Working reactions for **2MI** and corresponding values for the enthalpies of reaction and formation in the gaseous-phase, at T = 298.15 K (values in  $\text{kJ}\cdot\text{mol}^{-1}$ ). <sup>a</sup>

| Working reactions                                                                 |                                                                                     |                   |                                                                                                                                                                       | $\Delta_r H_m^\circ(\text{g})$                                                                         | $\Delta_f H_m^\circ(\text{calc., g})$ |
|-----------------------------------------------------------------------------------|-------------------------------------------------------------------------------------|-------------------|-----------------------------------------------------------------------------------------------------------------------------------------------------------------------|--------------------------------------------------------------------------------------------------------|---------------------------------------|
| 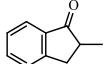 | + $\text{H}_2\text{C}=\text{CH}_2$                                                  | $\longrightarrow$ | 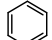 + 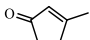 | (1) -11.62                                                                                             | -101.7                                |
| 2-methyl-1-indanone                                                               | ethene                                                                              |                   | benzene 3-methyl-2-cyclopentenone                                                                                                                                     |                                                                                                        |                                       |
| 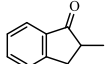 | + $\text{H}_3\text{C}-\text{CH}_3$                                                  | $\longrightarrow$ | 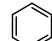 + 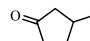 | (2) 34.07                                                                                              | -96.0                                 |
| 2-methyl-1-indanone                                                               | ethane                                                                              |                   | benzene 3-methyl-cyclopentenone                                                                                                                                       |                                                                                                        |                                       |
| 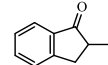 | + 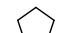 | $\longrightarrow$ | 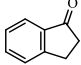 + 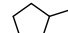 | (3) -1.10                                                                                              | -92.7                                 |
| 2-methyl-1-indanone                                                               | cyclopentane                                                                        |                   | 1-indanone methylcyclopentane                                                                                                                                         |                                                                                                        |                                       |
| 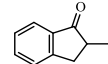 | + 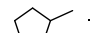 | $\longrightarrow$ | 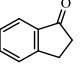 + 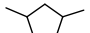 | (4) 0.32                                                                                               | -91.7                                 |
| 2-methyl-1-indanone                                                               | methylcyclopentane                                                                  |                   | 1-indanone 1,3-dimethylcyclopentane                                                                                                                                   |                                                                                                        |                                       |
| 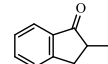 | + 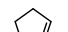 | $\longrightarrow$ | 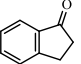 + 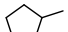 | (5) 0.20                                                                                               | -90.8                                 |
| 2-methyl-1-indanone                                                               | cyclopentene                                                                        |                   | 1-indanone 3-methylcyclopentene                                                                                                                                       |                                                                                                        |                                       |
| 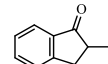 | + 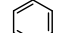 | $\longrightarrow$ | 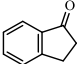 + 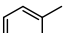 | (6) -2.89                                                                                              | -93.6                                 |
| 2-methyl-1-indanone                                                               | benzene                                                                             |                   | 1-indanone toluene                                                                                                                                                    |                                                                                                        |                                       |
|                                                                                   |                                                                                     |                   |                                                                                                                                                                       | $\langle \Delta_f H_m^\circ(\text{calc., g}) \rangle = -(94.4 \pm 4.2) \text{ kJ}\cdot\text{mol}^{-1}$ |                                       |

<sup>a</sup> The corresponding assigned uncertainty is twice the standard error of the mean of six results.

**Table S10.** Working reactions for **3MI** and corresponding values for the enthalpies of reaction and formation in the gaseous-phase, at  $T = 298.15$  K (values in  $\text{kJ}\cdot\text{mol}^{-1}$ ). <sup>a</sup>

| Working reactions                                                                 |                                                                                     |                   |                                                                                                                                                                       | $\Delta_r H_m^\circ(\text{g})$                                                                         | $\Delta_f H_m^\circ(\text{calc., g})$ |        |
|-----------------------------------------------------------------------------------|-------------------------------------------------------------------------------------|-------------------|-----------------------------------------------------------------------------------------------------------------------------------------------------------------------|--------------------------------------------------------------------------------------------------------|---------------------------------------|--------|
| 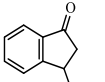 | + $\text{H}_2\text{C}=\text{CH}_2$                                                  | $\longrightarrow$ | 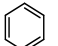 + 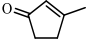 | (1)                                                                                                    | -11.71                                | -101.6 |
| 3-methyl-1-indanone                                                               | ethene                                                                              |                   | benzene                                                                                                                                                               | 3-methyl-2-cyclopentenone                                                                              |                                       |        |
| 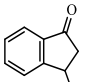 | + $\text{H}_3\text{C}-\text{CH}_3$                                                  | $\longrightarrow$ | 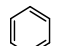 + 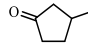 | (2)                                                                                                    | 33.97                                 | -95.9  |
| 3-methyl-1-indanone                                                               | ethane                                                                              |                   | benzene                                                                                                                                                               | 3-methyl-cyclopentenone                                                                                |                                       |        |
| 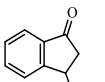 | + 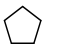 | $\longrightarrow$ | 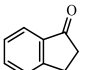 + 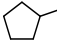 | (3)                                                                                                    | -1.20                                 | -92.6  |
| 3-methyl-1-indanone                                                               | cyclopentane                                                                        |                   | 1-indanone                                                                                                                                                            | methylcyclopentane                                                                                     |                                       |        |
| 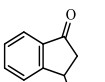 | + 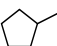 | $\longrightarrow$ | 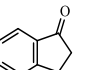 + 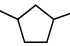 | (4)                                                                                                    | 0.23                                  | -91.6  |
| 3-methyl-1-indanone                                                               | methylcyclopentane                                                                  |                   | 1-indanone                                                                                                                                                            | 1,3-dimethylcyclopentane                                                                               |                                       |        |
| 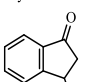 | + 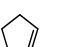 | $\longrightarrow$ | 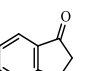 + 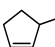 | (5)                                                                                                    | 0.11                                  | -90.7  |
| 3-methyl-1-indanone                                                               | cyclopentene                                                                        |                   | 1-indanone                                                                                                                                                            | 3-methylcyclopentene                                                                                   |                                       |        |
| 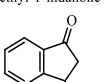 | + 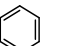 | $\longrightarrow$ | 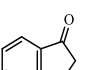 + 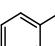 | (6)                                                                                                    | -2.99                                 | -93.5  |
| 3-methyl-1-indanone                                                               | benzene                                                                             |                   | 1-indanone                                                                                                                                                            | toluene                                                                                                |                                       |        |
|                                                                                   |                                                                                     |                   |                                                                                                                                                                       | $\langle \Delta_f H_m^\circ(\text{calc., g}) \rangle = -(94.3 \pm 4.2) \text{ kJ}\cdot\text{mol}^{-1}$ |                                       |        |

<sup>a</sup> The corresponding assigned uncertainty is twice the standard error of the mean of six results.

**Table S11.** Working reactions for **4MI** and corresponding values for the enthalpies of reaction and formation in the gaseous-phase, at  $T = 298.15$  K (values in  $\text{kJ}\cdot\text{mol}^{-1}$ ). <sup>a</sup>

| Working reactions                                                                                         |                                                                                                   |                   |                                                                                                                                                                                                              | $\Delta_r H_m^\circ(\text{g})$ | $\Delta_f H_m^\circ(\text{calc., g})$ |        |
|-----------------------------------------------------------------------------------------------------------|---------------------------------------------------------------------------------------------------|-------------------|--------------------------------------------------------------------------------------------------------------------------------------------------------------------------------------------------------------|--------------------------------|---------------------------------------|--------|
| 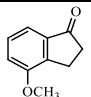<br>4-methoxy-1-indanone | $\text{H}_2\text{C}=\text{CH}_2$<br>ethene                                                        | $\longrightarrow$ | 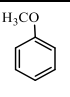<br>anisole + 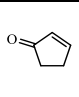<br>2-cyclopentenone         | (1)                            | 6.19                                  | -224.7 |
| 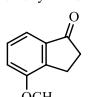<br>4-methoxy-1-indanone | $\text{H}_3\text{C}-\text{CH}_3$<br>ethane                                                        | $\longrightarrow$ | 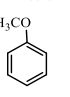<br>anisole + 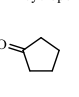<br>cyclopentanone           | (2)                            | 39.35                                 | -215.5 |
| 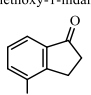<br>4-methoxy-1-indanone | 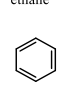<br>benzene      | $\longrightarrow$ | 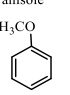<br>anisole + 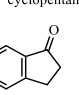<br>1-indanone               | (3)                            | 3.30                                  | -217.8 |
| 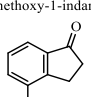<br>4-methoxy-1-indanone | 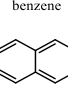<br>naphthalene  | $\longrightarrow$ | 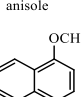<br>1-methoxynaphthalene + 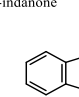<br>1-indanone  | (4)                            | 0.92                                  | -218.2 |
| 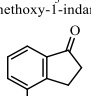<br>4-methoxy-1-indanone | 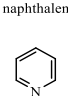<br>pyridine     | $\longrightarrow$ | 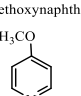<br>4-methoxypyridine + 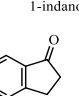<br>1-indanone     | (5)                            | -4.62                                 | -218.0 |
| 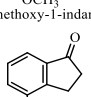<br>4-methoxy-1-indanone | 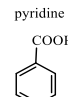<br>benzoic acid | $\longrightarrow$ | 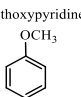<br>4-methoxybenzoic acid + 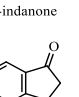<br>1-indanone | (6)                            | -1.36                                 | -220.5 |

$$\langle \Delta_f H_m^\circ(\text{calc., g}) \rangle = -(219.1 \pm 3.3) \text{ kJ}\cdot\text{mol}^{-1}$$

<sup>a</sup> The corresponding assigned uncertainty is twice the standard error of the mean of six results.

**Table S12.** Working reactions for **5MI** and corresponding values for the enthalpies of reaction and formation in the gaseous-phase, at  $T = 298.15$  K (values in  $\text{kJ}\cdot\text{mol}^{-1}$ ). <sup>a</sup>

| Working reactions                                                                  |     |       | $\Delta_r H_m^\circ(\text{g})$ | $\Delta_f H_m^\circ(\text{calc., g})$ |
|------------------------------------------------------------------------------------|-----|-------|--------------------------------|---------------------------------------|
| 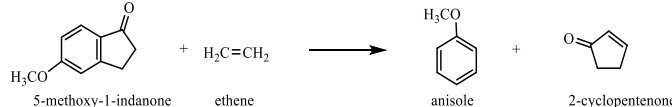 | (1) | 7.33  | -225.8                         |                                       |
| 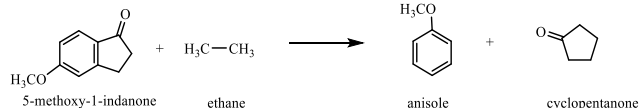  | (2) | 40.49 | -216.7                         |                                       |
| 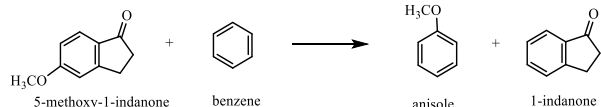  | (3) | 4.45  | -219.0                         |                                       |
| 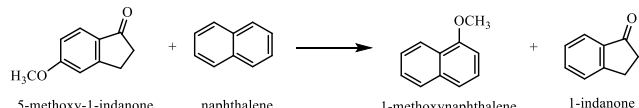  | (4) | 2.07  | -219.4                         |                                       |
| 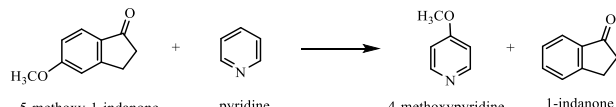  | (5) | -3.47 | -219.1                         |                                       |
| 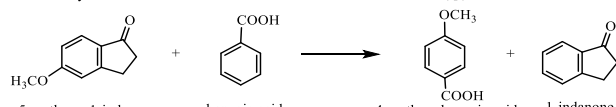  | (6) | -0.21 | -221.7                         |                                       |

$$\langle \Delta_f H_m^\circ(\text{calc., g}) \rangle = -(220.3 \pm 3.3) \text{ kJ}\cdot\text{mol}^{-1}$$

<sup>a</sup> The corresponding assigned uncertainty is twice the standard error of the mean of six results.

**Table S13.** Working reactions for 2-methylcyclopentanone and corresponding values for the enthalpies of reaction and formation in the gaseous-phase, at  $T = 298.15$  K (values in  $\text{kJ}\cdot\text{mol}^{-1}$ ). <sup>a</sup>

| Working reactions                                                                                                                                                                       |     | $\Delta_r H_m^\circ(\text{g})$ | $\Delta_f H_m^\circ(\text{calc., g})$ |
|-----------------------------------------------------------------------------------------------------------------------------------------------------------------------------------------|-----|--------------------------------|---------------------------------------|
| 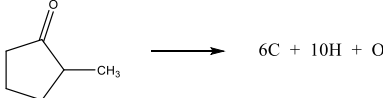<br>2-methylcyclopentanone                                                                             | (1) | 6952.47                        | -223.3                                |
| 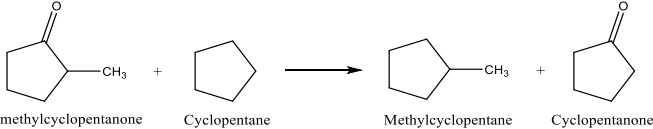<br>2-methylcyclopentanone    Cyclopentane    Methylcyclopentane    Cyclopentanone                     | (2) | 0.39                           | -227.6                                |
| 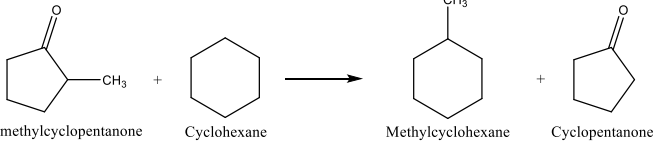<br>2-methylcyclopentanone    Cyclohexane    Methylcyclohexane    Cyclopentanone                       | (3) | -0.70                          | -228.0                                |
| 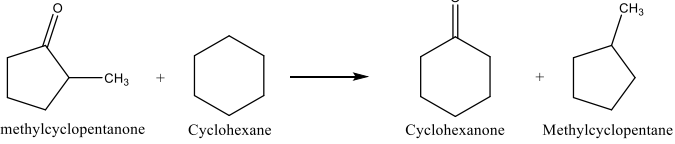<br>2-methylcyclopentanone    Cyclohexane    Cyclohexanone    Methylcyclopentane                      | (4) | 13.33                          | -227.3                                |
| 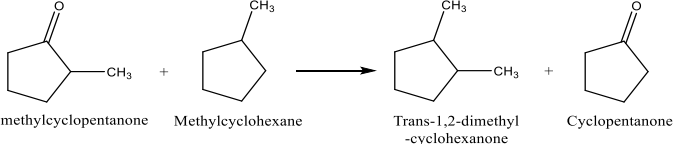<br>2-methylcyclopentanone    Methylcyclohexane    Trans-1,2-dimethylcyclohexanone    Cyclopentanone | (5) | -0.55                          | -227.3                                |
| $\langle \Delta_f H_m^\circ(\text{calc., g}) \rangle = -(226.7 \pm 2.4) \text{ kJ}\cdot\text{mol}^{-1}$                                                                                 |     |                                |                                       |

<sup>a</sup> The corresponding assigned uncertainty is twice the standard error of the mean of five results.

**Table S14.** G3(MP2)//B3LYP absolute enthalpies (in *Hartrees*\*) and experimental enthalpies of formation (in  $\text{kJ}\cdot\text{mol}^{-1}$ ), in the gaseous state, at  $T = 298.15$ , for the studied compounds and the auxiliary molecules used in the gas-phase working reactions.

| auxiliary molecules            | G3(MP2)//B3LYP<br>absolute enthalpies | Experimental<br>enthalpies of formation<br>(298.15 K) |
|--------------------------------|---------------------------------------|-------------------------------------------------------|
| 2-methyl-1-indanone (2MI)      | -461.563388                           | $(-105.4 \pm 3.4)^a$                                  |
| 3-methyl-1-indanone (3MI)      | -461.563351                           | $(-92.9 \pm 3.3)^a$                                   |
| 4-methoxy-1-indanone (4MI)     | -536.696571                           | $(-217.6 \pm 3.4)^a$                                  |
| 5-methoxy-1-indanone (5MI)     | -536.697008                           | $(-215.6 \pm 2.0)^a$                                  |
| 1,3-dimethylcyclopentane       | -274.639267                           | $(-133.6 \pm 1.4)^{[S9]}$                             |
| 1-indanone                     | -422.325250                           | $(-64.0 \pm 3.8)^{[S10]}$                             |
| 1-methoxynaphthalene           | -499.594649                           | $(-3.0 \pm 3.1)^{[S11]}$                              |
| 2-cyclopentenone               | -268.923985                           | $(-98.1 \pm 3.7)^{[S12]}$                             |
| 2-methylcyclopentanone         | -309.366108                           | $(-226.7 \pm 2.4)^b$                                  |
| 3-methylcyclopentanone         | -309.366295                           | $(-228.3 \pm 3.7)^b$                                  |
| 3-methylcyclopentene           | -234.194016                           | $(7.4 \pm 0.6)^{[S9]}$                                |
| 3-methyl-2-cyclopentenone      | -308.167646                           | $(-143.4 \pm 2.1)^{[S12]}$                            |
| 4-methoxybenzoic acid          | -534.582112                           | $(-451.9 \pm 1.4)^{[S9]}$                             |
| 4-methoxypyridine              | -362.246513                           | $(-18.2 \pm 1.8)^{[S13]}$                             |
| Anisole                        | -536.695848                           | $(-216.0 \pm 3.1)^{[S9]}$                             |
| Benzene                        | -231.835136                           | $(82.6 \pm 0.7)^{[S9]}$                               |
| Benzoic acid                   | -420.210274                           | $(-294.0 \pm 2.2)^{[S9]}$                             |
| Cyclohexane                    | -235.407838                           | $(-123.3 \pm 0.8)^{[S9]}$                             |
| Cyclohexanone                  | -309.367618                           | $(-231.1 \pm 0.8)^{[S9]}$                             |
| Cyclopentane                   | -196.162695                           | $(-76.4 \pm 0.7)^{[S9]}$                              |
| Cyclopentanone                 | -270.127404                           | $(-192.1 \pm 1.8)^{[S9]}$                             |
| Cyclopentene                   | -194.955955                           | $(34.0 \pm 1.4)^{[S9]}$                               |
| Ethane                         | -79.651018                            | $(-83.8 \pm 0.3)^{[S9]}$                              |
| Ethene                         | -78.434969                            | $(52.5 \pm 0.3)^{[S9]}$                               |
| Methylcyclohexane              | -274.646808                           | $(-154.6 \pm 1.0)^{[S9]}$                             |
| Methylcyclopentane             | -235.401252                           | $(-106.2 \pm 0.7)^{[S9]}$                             |
| Naphthalene                    | -385.223680                           | $(150.3 \pm 1.4)^{[S9]}$                              |
| Pyridine                       | -247.873423                           | $(140.4 \pm 0.7)^{[S9]}$                              |
| Toluene                        | -271.074374                           | $(50.1 \pm 1.1)^{[S14]}$                              |
| Trans-1,2-dimethylcyclopentane | -274.640164                           | $(-136.6 \pm 1.1)^{[S9]}$                             |

<sup>a</sup> This work. <sup>b</sup> Value estimated at the G3(MP2)//B3LYP level of theory. \* 1 Hartree =  $2625.5 \text{ kJ}\cdot\text{mol}^{-1}$

## REFERENCES

---

- [S1] Skinner, H.A.; Snelson, A. The heats of combustion of the four isomeric butyl alcohols, *Trans. Faraday Soc.*, **1960**, 56, 1776.
- [S2] Coops, J.; Jessup, R.S.; van Nes, K. Calibration of calorimeters for reactions in a bomb at constant volume. In *Experimental Thermochemistry. Measurement of Heats of Reaction*, 1st ed.; Rossini F.D., ed.; Interscience Publishers, Inc., New York, 1956; Volumen 1, pp. 27-58.
- [S3] Washburn, E.W. Standard states for bomb calorimetry, *J. Res. Nat. Bur. Stand.*, **1933**, 10, 525.
- [S4] Cox, J.D.; Wagman, D.D.; Medvedev, V.A. *CODATA key values for thermodynamics*, Hemisphere, New York, 1979.
- [S5] Yaws, C.L.; Chen, D.H. Density of Solid – Organic Compounds. In *Thermophysical Properties of Chemicals and Hydrocarbons*, 1st ed.; Yaws, C.L., ed.; William Andrew Inc., New York, 2008, pp. 264-352.
- [S6] Abid, O.R.; Qadeer, G.; Rama, N.H.; Wong, W.Y. 5-Methoxyindan-1-one, *Acta Cryst.*, **2007**, E63, o165-o166.
- [S7] Hubbard, W.N.; Scott D.W.; Waddington, G. Standard states and corrections for combustions in a bomb at constant volume. In *Experimental Thermochemistry. Measurement of Heats of Reaction*, 1st ed.; Rossini F.D., ed.; Interscience Publishers, Inc., New York, 1956; Volumen 1, pp. 75-128.
- [S8] Hurst, J.E.; Harrison, B.K. Estimation of liquid and solid heat capacities using a modified Kopp's rule, *Chem. Eng. Comm.*, **1992**, 112, 21-30.
- [S9] Pedley, J.B. *Thermochemical data and structures of organic compounds*, Thermodynamics Research Center. College Station, Texas, 1994.
- [S10] Matos, M.A.R.; Miranda, M.S.; Monte, M.J.S.; Santos, L.M.N.B.F.; Morais, V.M.F.; Chickos, J.S.; Umnahanant P.; Liebman, J.F. Calorimetric and computational study of indanones, *J. Phys. Chem. A*, **2007**, 111, 11153-11159.
- [S11] Silva, A.L.R.; Freitas, V.L.S.; Ribeiro da Silva, M.D.M.C. Effects of methoxy and formyl substituents on the energetics and reactivity of  $\alpha$ -naphthalenes: A calorimetric and computational study, *Chemosphere*, **2014**, 107, 203-210.
- [S12] Silva, A.L.R.; Moura, C.; Ribeiro da Silva, M.D.M.C. Energetic vs structural study of two biomass degradation derivatives: 2-Cyclopentenone and 3-methyl-2-cyclopentenone, *J. Chem. Thermodyn.*, **2019**, 132, 390-396.
- [S13] Amaral, L.M.P.F.; Ribeiro da Silva, M.A.V. Thermochemistry of some methoxypyridines, *J. Chem. Thermodyn.*, **2012**, 48, 65-69.
- [S14] Roux, M.V.; Temprado, M.; Chickos, J.S.; Nagano, Y. Critically evaluated thermochemical properties of polycyclic aromatic hydrocarbons, *J. Phys. Chem. Ref. Data*, **2008**, 37, 1855-1996.
